# Supplementary material for: A New Noise-Tolerant Obstacle Avoidance Scheme for Motion Planning of Redundant Robot Manipulators
Source: PubMed Central journal article supplement (PMC6124349; doi:10.3389/fnbot.2018.00051), 2018-08-29
Supplement: Data_Sheet_1.pdf [file Data_Sheet_1.pdf]

## Appendix A: Proof of Theorem 1

Based on the analysis in Section 2.2, the proposed NTOA scheme (6) can be reformulated as

$$J\dot{\theta} = \dot{r}_d - k_P(f(\theta) - r_d) - k_I \int_0^t (f(\theta) - r_d)d\tau.$$

which is equivalent to

$$\dot{e}(t) = -k_P e(t) - k_I \int_0^t e(\tau)d\tau,$$

where  $e(t) = f(\theta) - r_d$  and  $\dot{e}(t) = J\dot{\theta} - \dot{r}_d$  with  $J = \partial f(\theta)/\partial \theta$ . (8) is a compact vector form of the following set of  $m$  decoupled equations:

$$\dot{e}_i(t) = -k_P e_i(t) - k_I \int_0^t e_i(\tau)d\tau,$$

in which  $i = 1, \dots, m$ . To analyze the  $i$ th subsystem (9), the following Lyapunov function candidate [38, 39] is defined:

$$v_i(t) = e_i^2(t) + k_I \left( \int_0^t e_i(\tau)d\tau \right)^2.$$

Evidently,  $v_i(t) > 0$  for any  $e_i(t) \neq 0$  or  $\int_0^t e_i(\tau)d\tau \neq 0$ , and  $v_{ij}(t) = 0$  only for  $e_{ij}(t) = \int_0^t e_{ij}(\tau)d\tau = 0$ . This guarantees the positive-definiteness of the Lyapunov function candidate  $v_i(t)$ . For this Lyapunov function candidate, the time derivative  $\dot{v}_i(t)$  can be derived as

$$\dot{v}_i(t) = \frac{dv_i(t)}{dt} = 2e_i(t)\dot{e}_i(t) + 2k_I e_i(t) \int_0^t e_i(\tau)d\tau = -2k_P e_i^2(t) \leq 0,$$

which guarantees the negative-definiteness of  $\dot{v}_i(t)$ . On the basis of the Lyapunov theory, the trajectory of the Cartesian error  $e(t)$  for the proposed NTOA scheme (6) can be concluded to be asymptotically stable. The proof is thus completed.

## Appendix B: Proof of Theorem 2

Let us define  $\varepsilon(t) = \int_0^t e(\tau)d\tau \in R^m$ . Then,  $\dot{\varepsilon}(t) = e(t)$  and  $\ddot{\varepsilon}(t) = \dot{e}(t)$ . The  $i$ th subsystem (9) is thus rewritten as follows:

$$\ddot{\varepsilon}_i(t) = -k_P \dot{\varepsilon}_i(t) - k_I \varepsilon_i(t),$$

where  $\varepsilon_i(t)$ ,  $\dot{\varepsilon}_i(t)$ , and  $\ddot{\varepsilon}_i(t)$  are the  $i$ th elements of  $\varepsilon(t)$ ,  $\dot{\varepsilon}(t)$ , and  $\ddot{\varepsilon}(t)$ , respectively.

As defined previously, the design parameters  $k_P$  and  $k_I$  satisfy  $k_P^2 > 4k_I$  numerically. Therefore, let  $\vartheta_1 = (-k_P + \sqrt{k_P^2 - 4k_I})/2$  and  $\vartheta_2 = (-k_P - \sqrt{k_P^2 - 4k_I})/2$ . Then, considering that  $\varepsilon_i(0) = 0$  and  $\dot{\varepsilon}_i(0) = e_i(0)$ , the analytical solution to (10) is formulated as

$$\varepsilon_i(t) = \frac{e_i(0)(\exp(\vartheta_1 t) - \exp(\vartheta_2 t))}{\sqrt{k_P^2 - 4k_I}}.$$

Because  $e(t) = \dot{\varepsilon}(t)$ , the following result is further obtained:

$$e_i(t) = \frac{e_i(0)(\vartheta_1 \exp(\vartheta_1 t) - \vartheta_2 \exp(\vartheta_2 t))}{\sqrt{k_P^2 - 4k_I}}.$$

The vector-form Cartesian error  $e(t)$  is thus derived as follows:

$$e(t) = \frac{e(0)(\vartheta_1 \exp(\vartheta_1 t) - \vartheta_2 \exp(\vartheta_2 t))}{\sqrt{k_P^2 - 4k_I}}.$$

On the basis of the above analysis (as well as the proof of Theorem 1), starting from an initial state  $e(0) \neq 0$  (i.e., a nonzero initial error), the trajectory of the Cartesian error  $e(t)$  for the proposed NTOA scheme (6) can be concluded to converge to zero exponentially. In other words, the Cartesian error  $e(t)$  synthesized by (6) has the property of exponential convergence, which now completes the proof.

## Appendix C: Proof of Theorem 3

Based on Appendix A, the noise-polluted NTOA scheme (7) can be reformulated as follows:

$$J\dot{\theta} = \dot{r}_d - k_P(f(\theta) - r_d) - k_I \int_0^t (f(\theta) - r_d)d\tau + \delta(t),$$

which is equivalent to

$$\dot{e}(t) = -k_P e(t) - k_I \int_0^t e(\tau)d\tau + \delta(t).$$

By using the Laplace transformation [41], the  $i$ th subsystem of (11) is as follows:

$$s e_i(s) - e_i(0) = -k_P e_i(s) - \frac{k_I}{s} e_i(s) + \delta_i(s).$$

Then, the following result is obtained:

$$e_i(s) = \frac{s(e_i(0) + \delta_i(s))}{s^2 + k_P s + k_I}.$$

Evidently, the transfer function is derived as follows:

$$\frac{s}{s^2 + k_P s + k_I},$$

of which the poles are  $(-k_P + \sqrt{k_P^2 - 4k_I})/2$  and  $(-k_P - \sqrt{k_P^2 - 4k_I})/2$ . Note that, as defined previously,  $k_P$  and  $k_I$  satisfy  $k_P^2 > 4k_I > 0$  numerically.

Therefore, such two poles are located on the left half-plane, indicating the stability of the system (12).

Note that  $\delta(t) = c \in R^m$  (being a constant), and thus  $\delta_i(s) = c/s$ . For (12), using the final value theorem [41] yields

$$\lim_{t \rightarrow \infty} e_i(t) = \lim_{s \rightarrow 0} s e_i(s) = \lim_{s \rightarrow 0} \frac{s^2(e_i(0) + c/s)}{s^2 + k_P s + k_I} = 0.$$

According to (13),  $\lim_{t \rightarrow \infty} \|e(t)\|_2 = 0$  with symbol  $\|\cdot\|_2$  denoting the two norm of a vector. On the basis of the above analysis, the trajectory of  $e(t)$  for the noise-polluted NTOA scheme (7) can be concluded to converge to zero. In other words, the Cartesian error  $e(t)$  synthesized by (7) has a convergence property, which now completes the proof.

## Appendix D: Proof of Theorem 4

As presented in Appendix C, the noise-polluted NTOA scheme (7) can be rewritten as follows:

$$\dot{e}(t) = -k_P e(t) - k_I \int_0^t e(\tau) d\tau + \delta(t),$$

where the  $i$ th ( $\forall i = 1, \dots, m$ ) subsystem is formulated as

$$\dot{e}_i(t) = -k_P e_i(t) - k_I \int_0^t e_i(\tau) d\tau + \delta_i(t).$$

Considering that  $k_P$  and  $k_I$  satisfy  $k_P^2 > 4k_I > 0$  numerically, the solution to (14) is obtained as follows:

$$e_i(t) = \frac{e_i(0)(\vartheta_1 \exp(\vartheta_1 t) - \vartheta_2 \exp(\vartheta_2 t))}{\sqrt{k_P^2 - 4k_I}} + \frac{1}{\sqrt{k_P^2 - 4k_I}} \int_0^t (\vartheta_1 \exp(\vartheta_1(t - \tau)) - \vartheta_2 \exp(\vartheta_2(t - \tau))) \delta_i(\tau) d\tau.$$

From the triangle inequality,

$$|e_i(t)| \leq \frac{|e_i(0)(\vartheta_1 \exp(\vartheta_1 t) - \vartheta_2 \exp(\vartheta_2 t))|}{\sqrt{k_P^2 - 4k_I}} + \frac{\int_0^t |\vartheta_1 \exp(\vartheta_1(t - \tau))| |\delta_i(\tau)| d\tau}{\sqrt{k_P^2 - 4k_I}} + \frac{\int_0^t |\vartheta_2 \exp(\vartheta_2(t - \tau))| |\delta_i(\tau)| d\tau}{\sqrt{k_P^2 - 4k_I}}.$$

It follows the above inequality that

$$|e_i(t)| \leq \frac{|e_i(0)(\vartheta_1 \exp(\vartheta_1 t) - \vartheta_2 \exp(\vartheta_2 t))|}{\sqrt{k_P^2 - 4k_I}} + \frac{2}{\sqrt{k_P^2 - 4k_I}} \max_{0 \leq \tau \leq t} |\delta_i(\tau)|.$$

Therefore, the following result is obtained:

$$\limsup_{t \rightarrow \infty} \|e(t)\|_2 \leq 2 \sqrt{\frac{m}{k_P^2 - 4k_I}} \max_{0 \leq \tau \leq t} |\delta_i(\tau)|.$$

On the basis of the above analysis, the Cartesian error  $e(t)$  synthesized by the noise-polluted NTOA scheme (7) in the presence of bounded time-varying noise can be concluded to be bounded, with the steady-state error being bounded by  $2\sqrt{m} \max_{0 \leq \tau \leq t} |\delta_i(\tau)| / \sqrt{k_P^2 - 4k_I}$ . The proof is thus completed.
